# Supplementary material
Source: PubMed Central journal article supplement (PMC5955788)

**Figure S1. Pathology development is dose, time, and conformation dependent.** **a**, WT primary hippocampal neurons treated with Hu<sup>wt</sup> or Hu<sup>S87N</sup> PFFs immunostained for NFL, NeuN, pSyn, and DAPI. **b**, **c**, pSyn and neuronal viability (NeuN) of primary cultures fixed at 15 DPT after Ms<sup>wt</sup> or Hu<sup>S87N</sup> PFF treatment. N = 18 wells from 3 biological replicates per group. Data are mean ± SEM with Kruskal-Wallis Test with Dunn's Multiple Comparison Test. \*p<0.05, \*\*p<0.01, \*\*\*p<0.001. Scale bar, 100µm.

**Figure S2. Endogenous aSyn and PFF fibrillar conformations are required to induce pathology and toxicity with mutant Hu<sup>S87N</sup> PFFs.** **a**, *SNCA*<sup>-/-</sup> primary hippocampal neurons treated with 350nM Hu<sup>S87N</sup> PFFs and immunostained for NeuN, pSyn, and DAPI at DPT 16. N = 10-11 wells from 3 biological replicates per group. Unpaired student t-test. **b**, WT primary hippocampal neurons treated with 350nM Hu<sup>S87N</sup> PFFs or Hu<sup>S87N</sup> monomer. Coverslips immunostained for NeuN, pSyn, and MAP2. Viability determined by number of NeuN<sup>+</sup> cells relative to PBS after treatment. Two-way ANOVA with Bonferroni post-tests. N= 6-7 wells from 2 biological replicates per group. Data are mean ± SEM. \*p<0.05, \*\*p<0.01. Scale bar, 100µm.

**Figure S3. Mixed neuronal-glia cultures are predominantly comprised of glutamatergic neurons and GABAergic neurons are resistant to PFF induced toxicity.** **a**, 14 DIV WT primary hippocampal neurons immunostained for NeuN, DAPI, and either Math2, Prox1 or CTIP2 transcription factors (TFs). Ratio as a percentage of each TF to NeuN is shown. Note that CTIP2<sup>+</sup> neurons also co-express either Math2 or Prox1. N = 11-12 wells from 3 biological replicates per group. Data are mean ± SEM. **b**, Immunostaining for GAD 67 and pSyn at 14 DPT. Arrows indicate GABAergic neurons without cell body aggregates. Arrowheads point to neurons that contain cell body aggregates. **c**, Immunostaining for GAD 67 and aSyn at 8 DIV. **d**, Immunostaining of WT primary hippocampal neurons for GAD 65/67, NeuN, pSyn, and DAPI treated with 350 nM Hu<sup>S87N</sup> PFFs and incubated until 15 DPT. **e**, GAD 65/67<sup>+</sup> area normalized to

PBS wells. N= 8-9 wells from 3 biological replicates per group. **f**, Neuronal viability determined by total NeuN counts of PFF relative to PBS. N= 4-6 wells from 2 biological replicates per group. **g**, Lysates of wt primary hippocampal neurons treated with 350 nM Hu<sup>S87N</sup> PFFs and incubated until 14 DPT immunoblotted for GAD 65/67. **h**, Expression levels of GAD 65/67 to PBS treated group. N= 9 wells from 3 biological replicates per group. All data are mean  $\pm$  SEM. Unpaired student t-test. \* $p < 0.05$ , \*\*\* $p < 0.001$ . Scale bar, 100  $\mu$ m.

**Figure S4. PFF induced toxicity is partially dependent on oxidative stress.** **a**, Neurons treated with either PBS or 200 nM Hu<sup>S87N</sup> PFFs and subsequently treated with vehicle or indicated treatment daily from 9-10 DPT to 13-14 DPT and fixed at 14-15DPT. Neuronal viability determined by NeuN counts of PFF group relative to PBS of treatment group and presented as percentage relative to PFF treatment + vehicle. Data are mean  $\pm$  SEM. N= 8-15 wells from 3 biological replicates. One-way ANOVA with Dunnett's post-test comparing all groups to NAC only treatment. \*\* $p < 0.01$ . **b**, Immunostaining of NeuN, pSyn, and DAPI of PBS and PFF treated neurons at 15 DPT after daily treatment from 9 -14 DPT with either vehicle, 100  $\mu$ M NAC or 100  $\mu$ M NAC + 5  $\mu$ M BSO. Scale bar, 100  $\mu$ m.

**Figure S5. Differential expression of aSyn mRNA in mouse hippocampal neurons.**

**a**, *In situ* hybridization of aSyn, Math2, CTIP2, and Prox1 mRNA showing relative expression levels in adult hippocampus (<http://brain-map.org>) [44]. **b**, Mean aSyn mRNA levels from RNA-seq of hippocampal neurons showing differential expression between CA and DG subpopulations (<http://hipposeq.janelia.org>) [14].

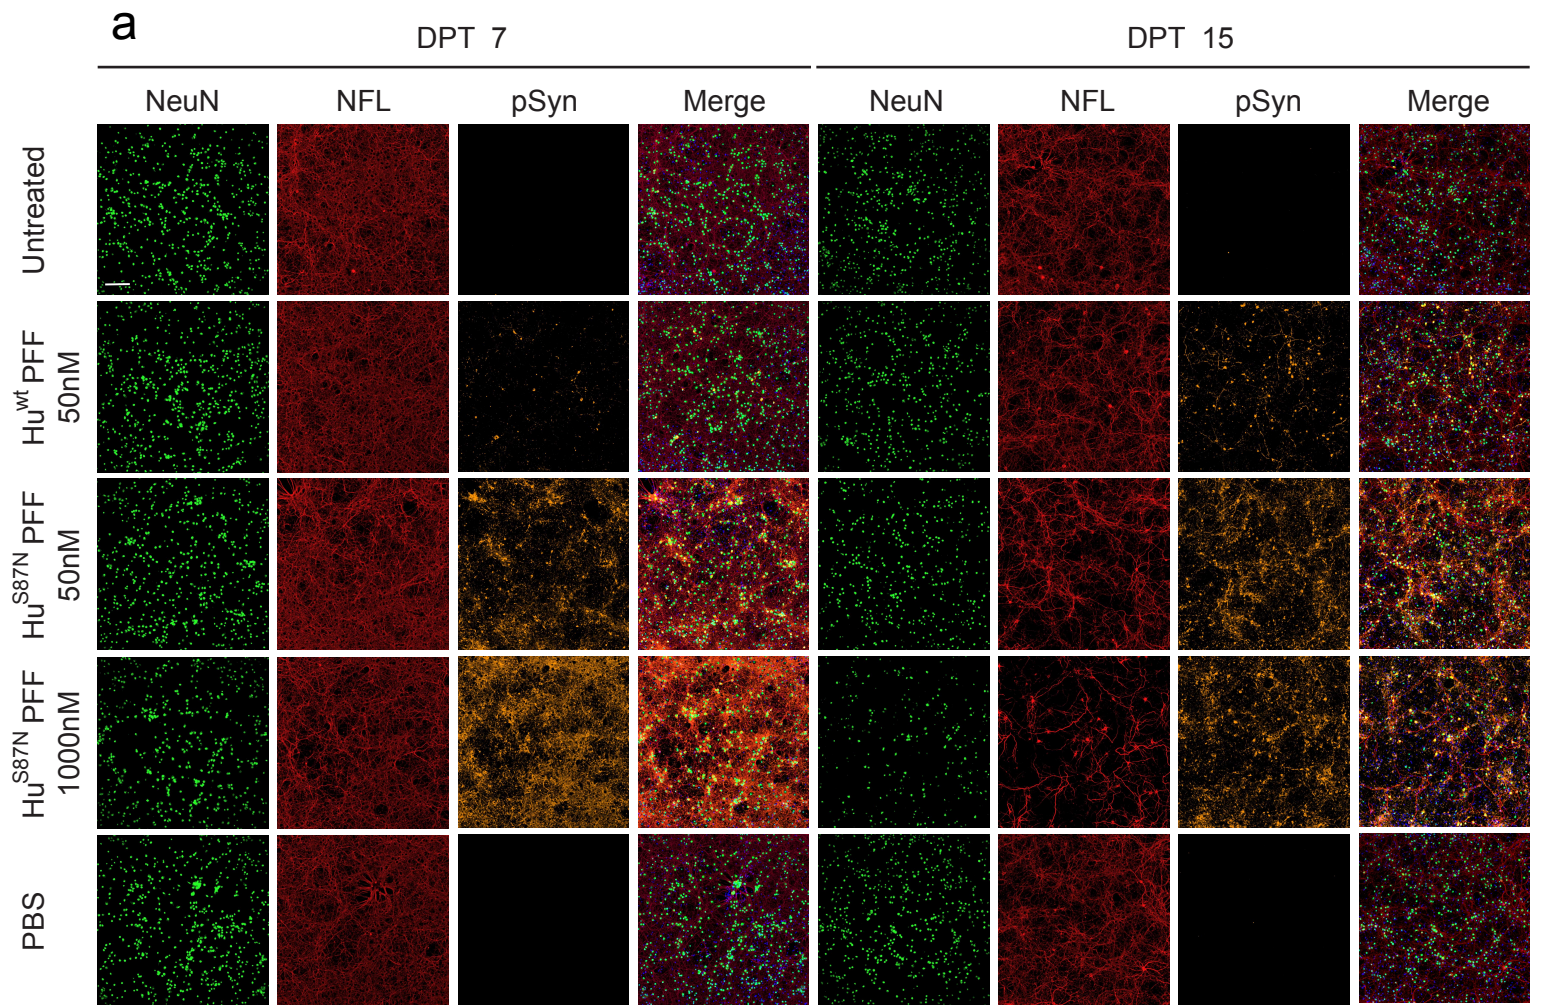**b**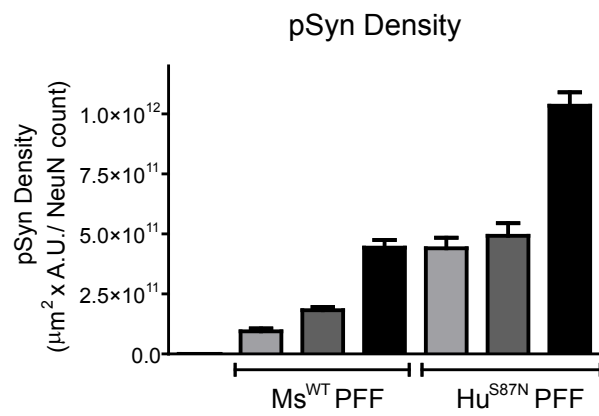**c**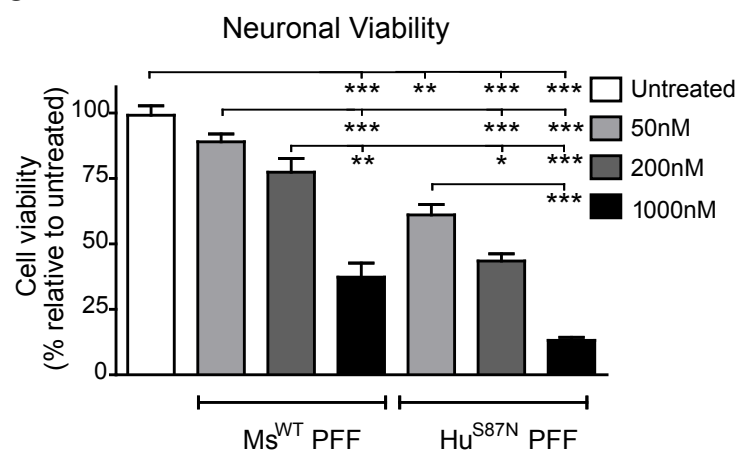

Supplemental Figure 2

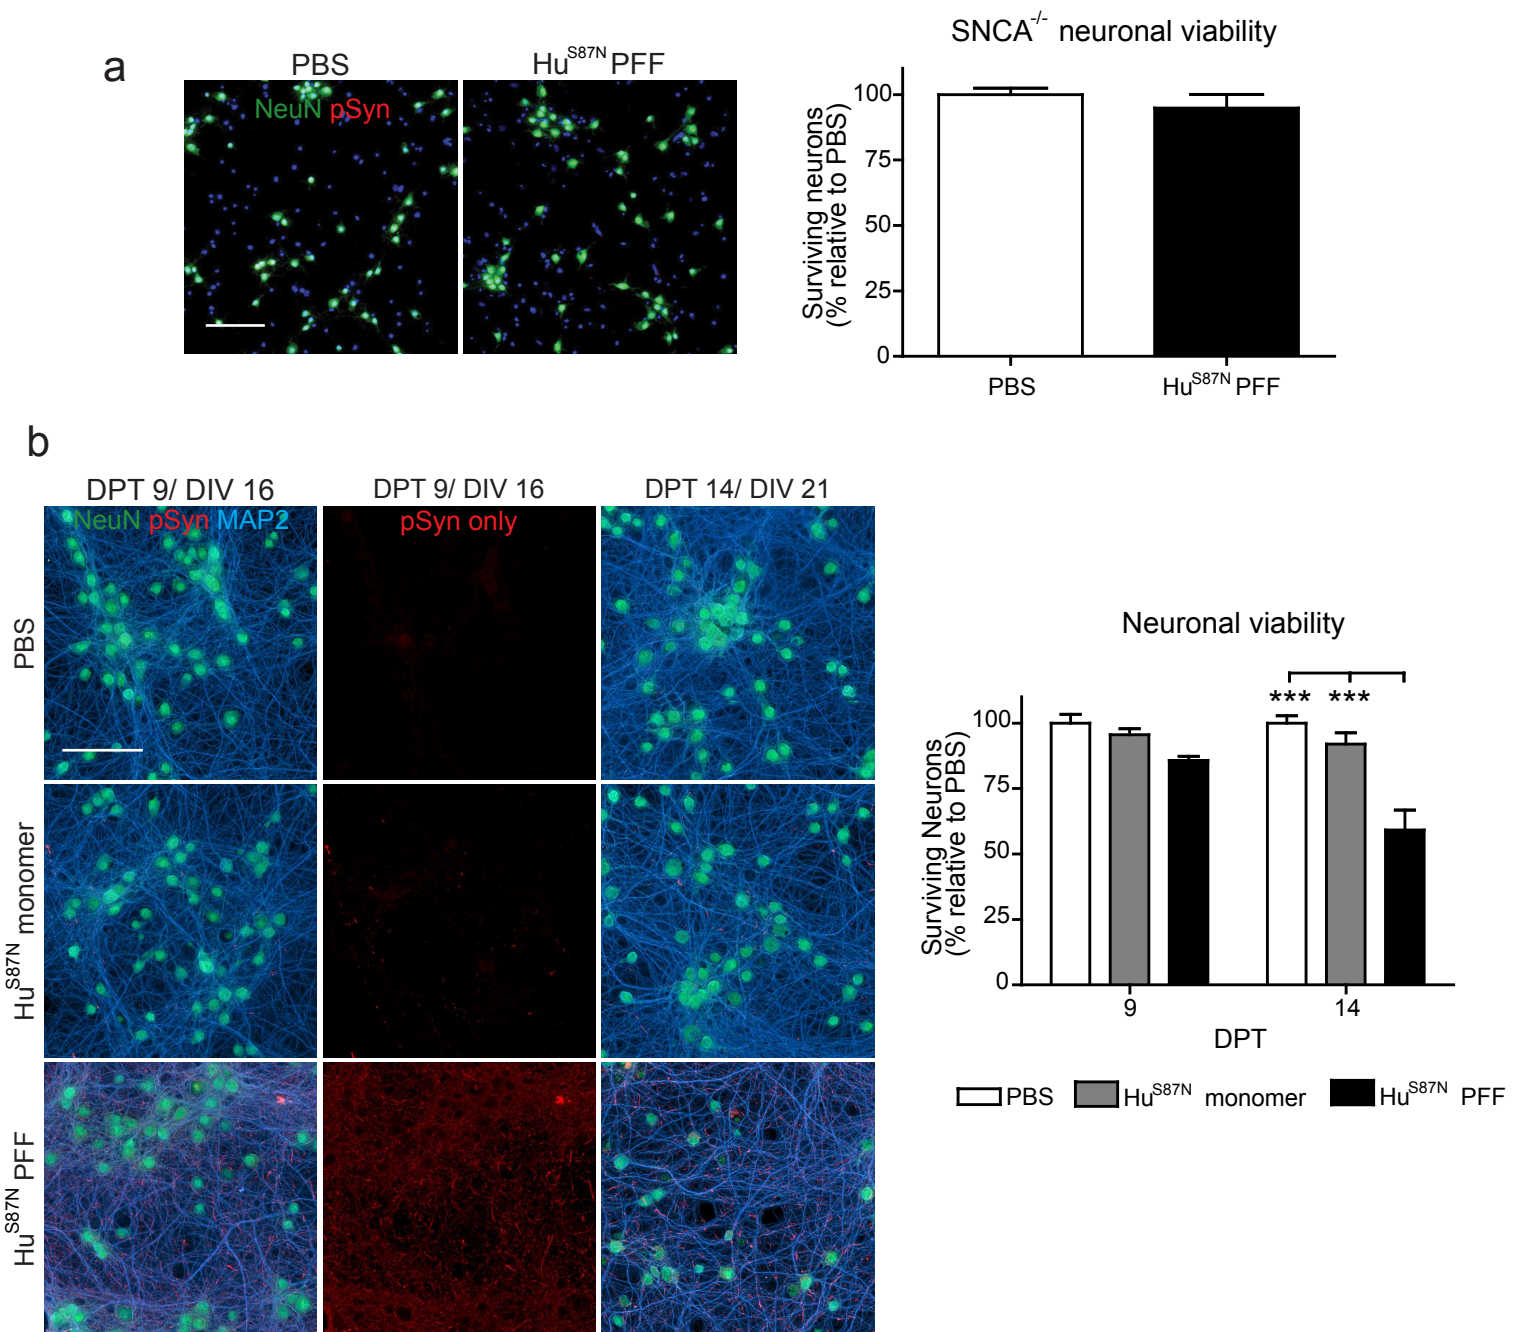

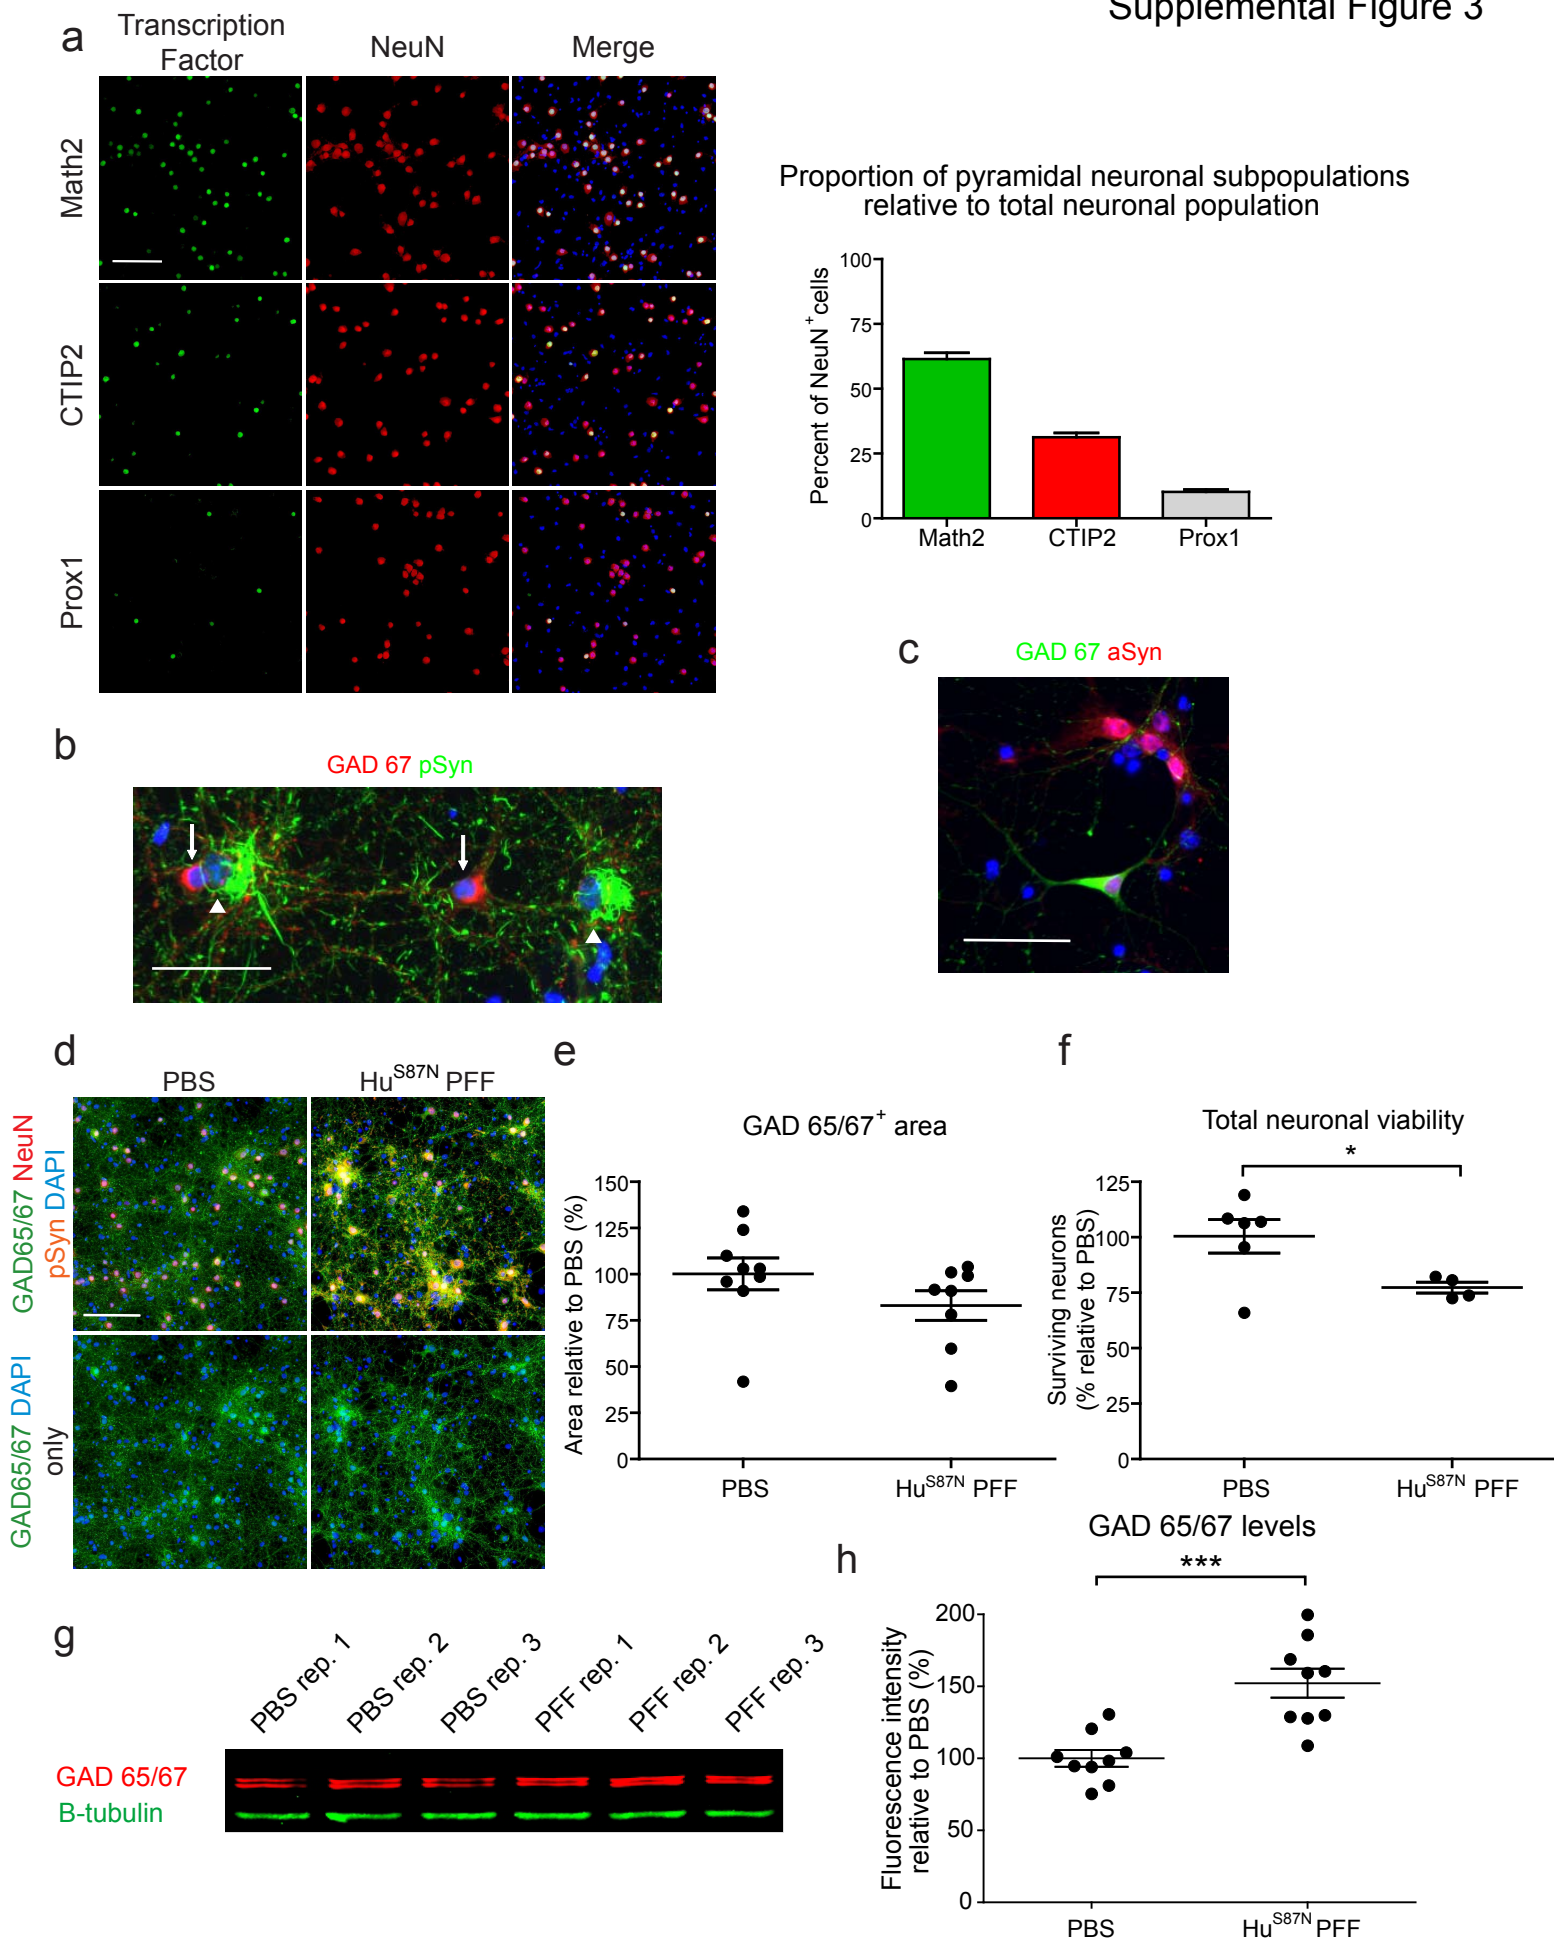

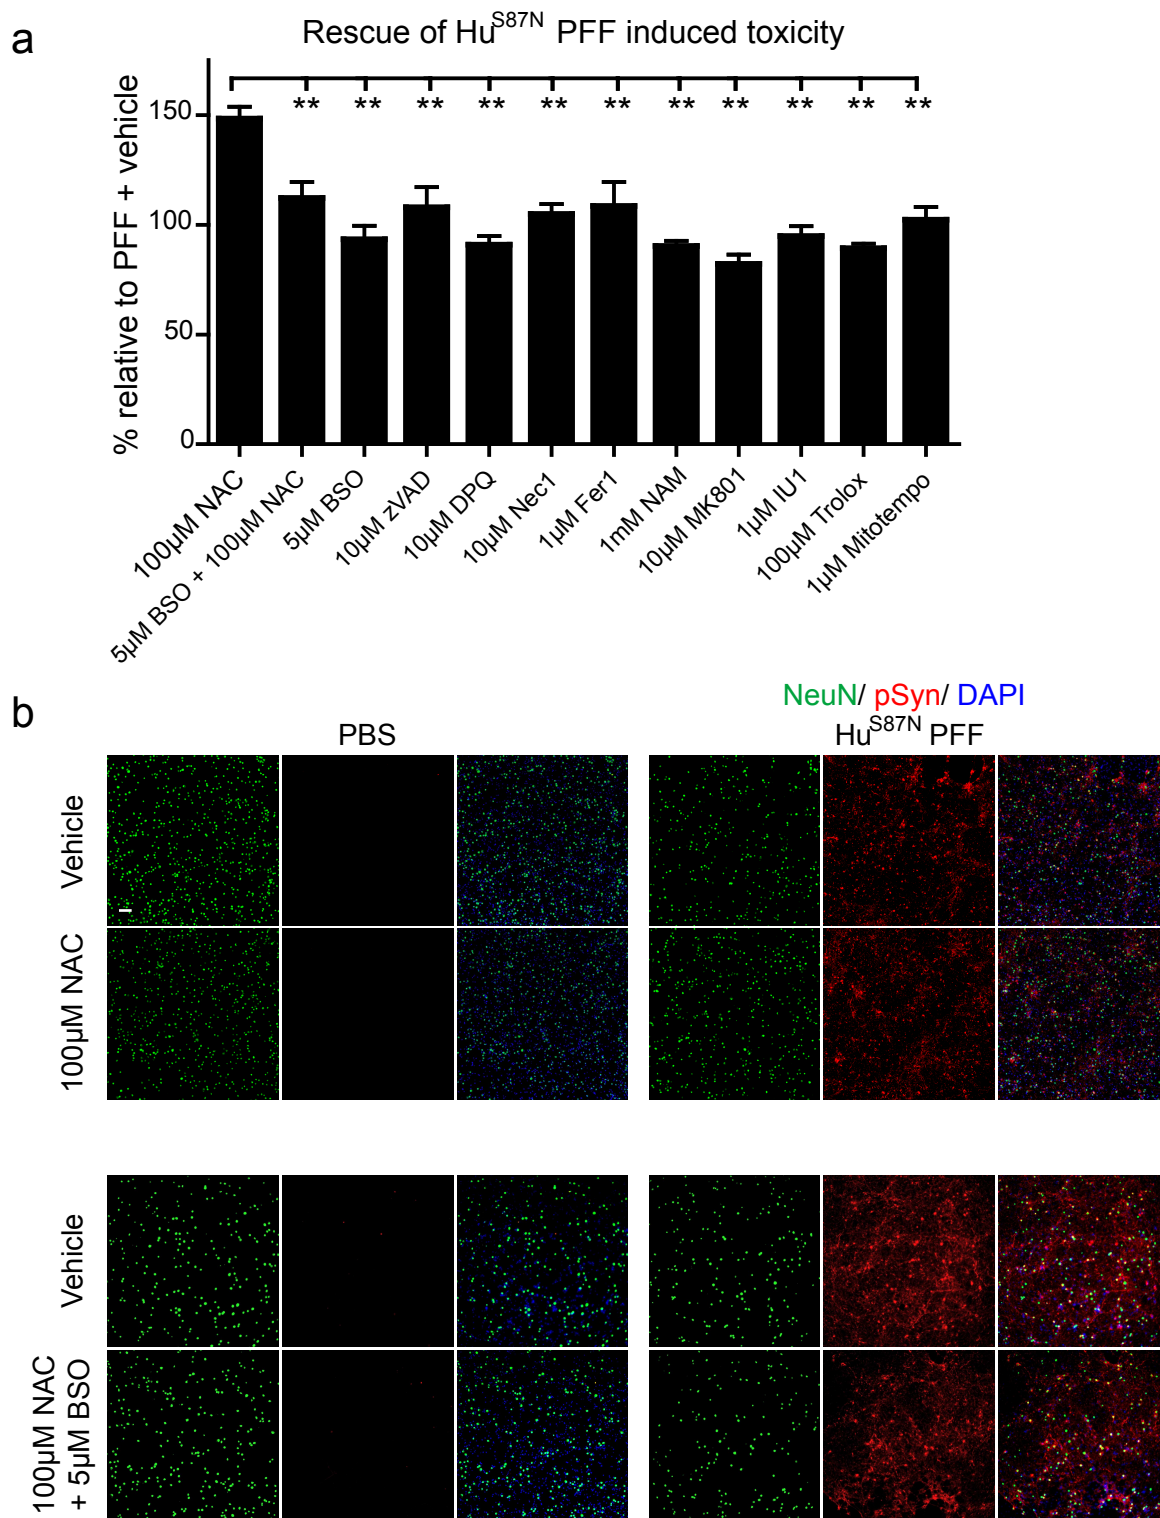

a

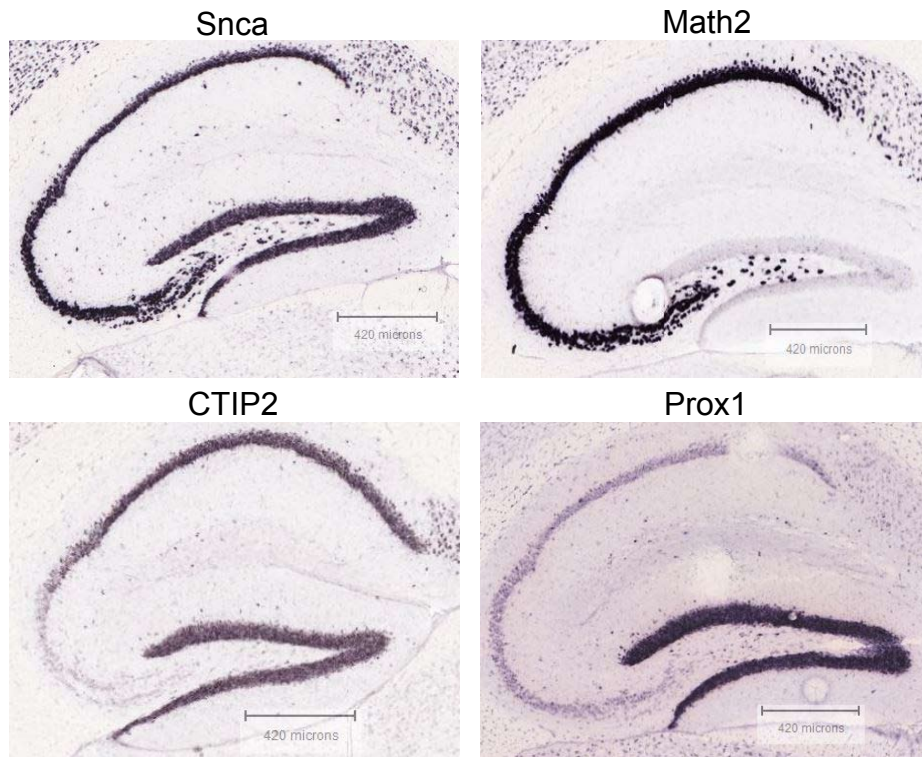

b

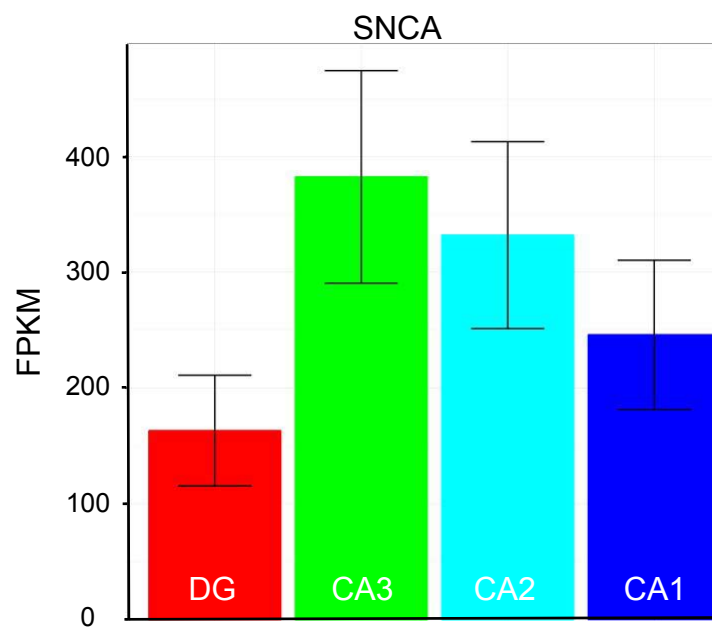

Supplement: NIHMS948621-supplement-Supplementary_Material.pdf [file NIHMS948621-supplement-Supplementary_Material.pdf]
